# Supplementary material for: A Systems Biology Comparison of Ovarian Cancers Implicates Putative Somatic Driver Mutations through Protein-Protein Interaction Models
Source: PubMed Central journal article supplement (PMC5082879; doi:10.1371/journal.pone.0163353), 2016-10-27

**GSE17308**

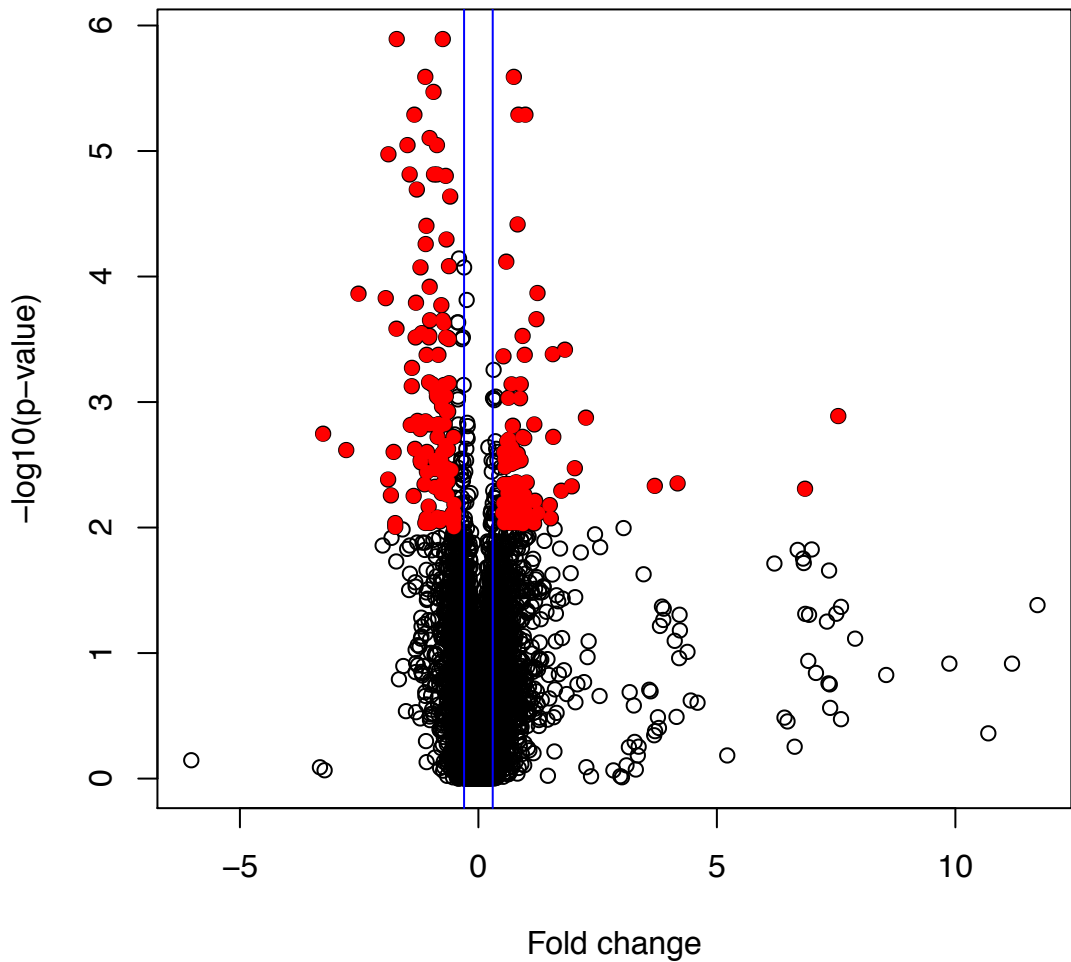

**GSE9891**

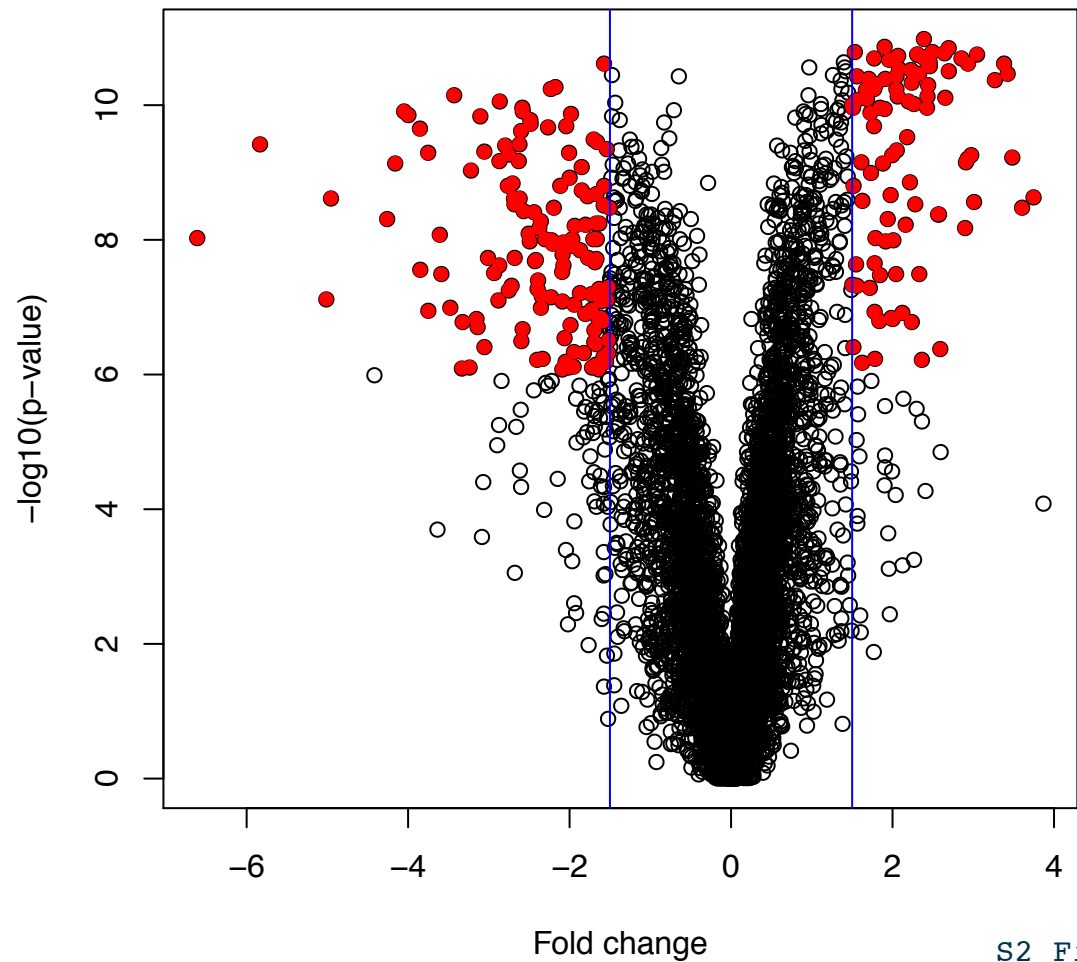

Supplement: pone.0163353.s002.pdf [file pone.0163353.s002.pdf]
