# Supplementary material for: A Systems Biology Comparison of Ovarian Cancers Implicates Putative Somatic Driver Mutations through Protein-Protein Interaction Models
Source: PubMed Central journal article supplement (PMC5082879; doi:10.1371/journal.pone.0163353), 2016-10-27
Supplement: pone.0163353.s008.pdf [file pone.0163353.s008.pdf]

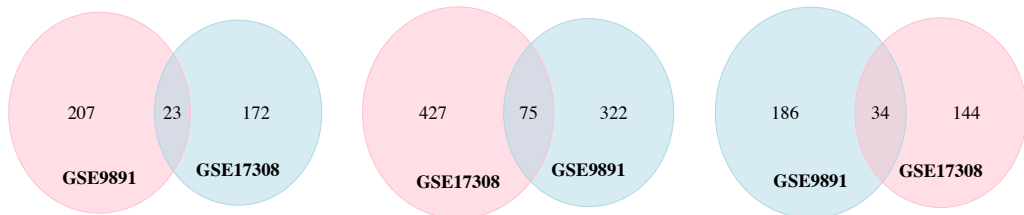

|                                       | <b>GSE17308</b> | <b>GSE9891</b> |
|---------------------------------------|-----------------|----------------|
| <b>Differentially expressed genes</b> | 195             | 230            |
| <b>Subnetworks*</b>                   | 175 (502)       | 179 (397)      |
| <b>Hub proteins</b>                   | 178             | 220            |

\*The number inside the parentheses is the number of genes that compose the corresponding subnetworks
